# Supplementary material for: Targeting NF-κB with Nanotherapy in a Mouse Model of Adult T-Cell Leukemia/Lymphoma
Source: MDPI journal article supplement (doi:10.3390/nano11061582), 2021-06-16
Supplement: s1 [file s1]

## Supplementary materials

# Targeting NF- $\kappa$ B with nanotherapy in a mouse model of Adult T-Cell Leukemia/Lymphoma

Daniel A. Rauch <sup>1,\*</sup>, John C. Harding <sup>1</sup>, Lee Ratner <sup>1</sup>, Samuel A. Wickline <sup>2</sup> and Hua Pan <sup>2,\*</sup>

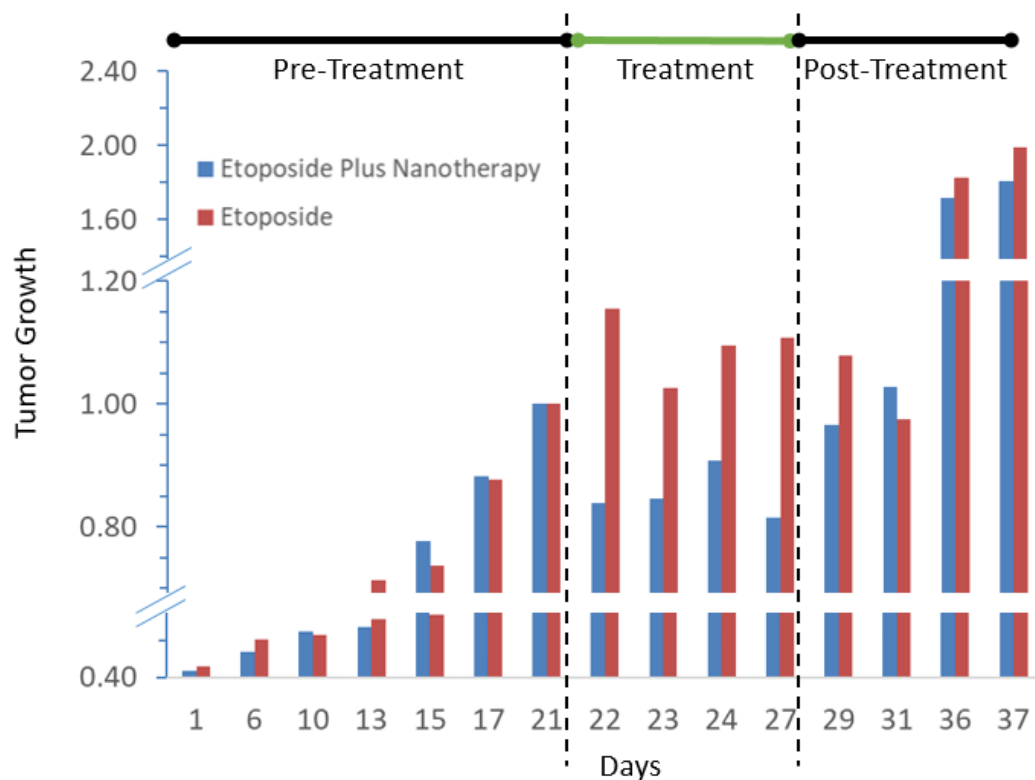

Supplementary Figure S1. Combination therapy of Etoposide and anti-NF- $\kappa$ B nanotherapy reduced tumor size, while monotherapy of Etoposide stopped tumor growth during the treatment period. All the tumor sizes have been normalized to the tumor size on day 21, when the combination therapy started.
